# Supplementary material
Source: PubMed Central journal article supplement (PMC2117268)

Figure 2

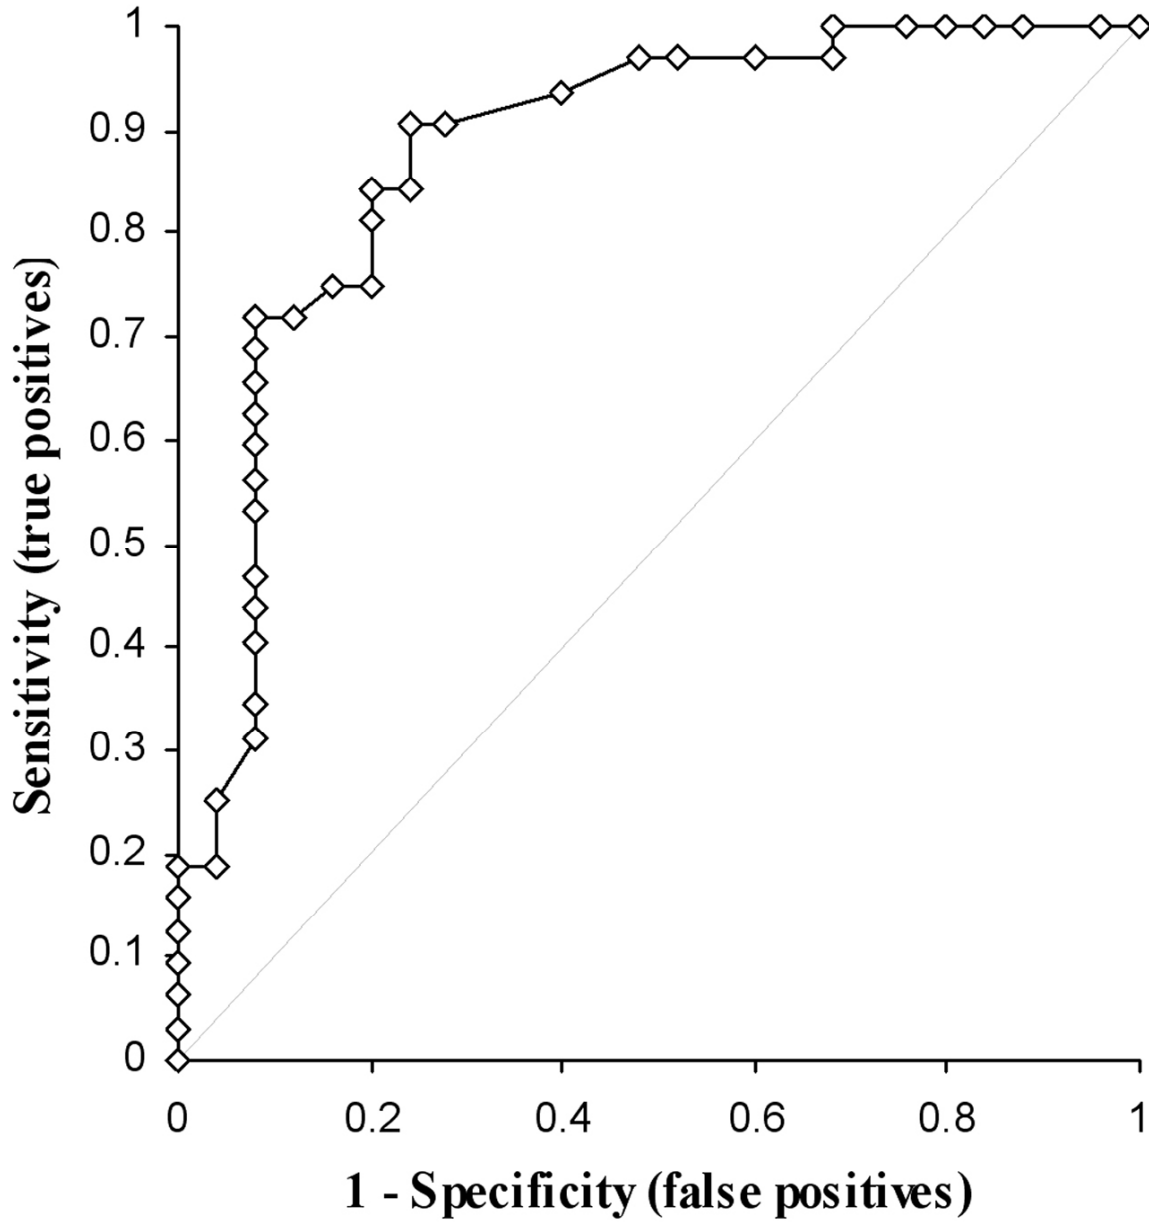

Supplement: thorax_thx.2006.069682_3.pdf [file thorax_thx.2006.069682_3.pdf]

Figure E2

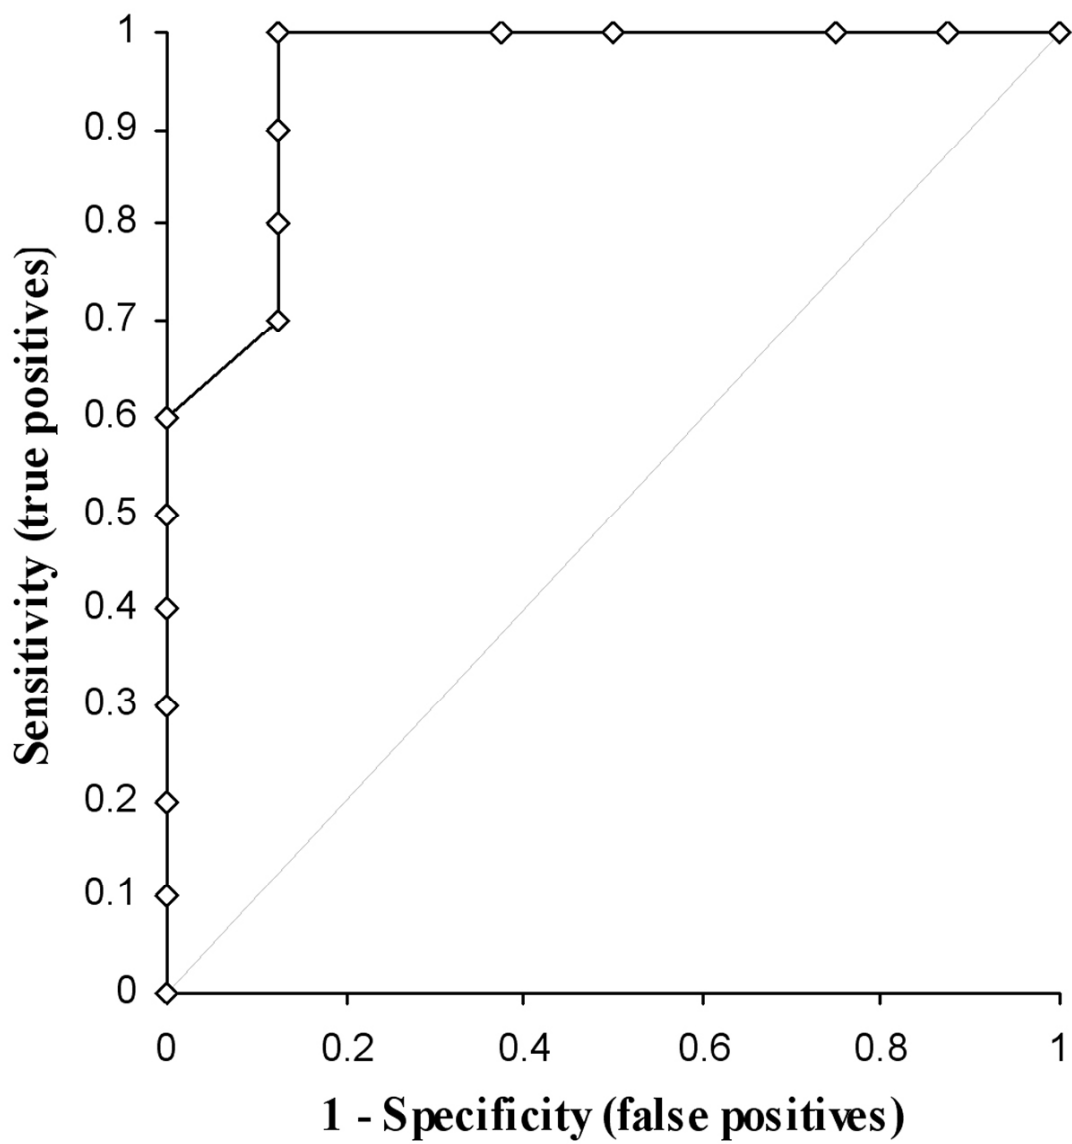

Supplement: thorax_thx.2006.069682_5.pdf [file thorax_thx.2006.069682_5.pdf]
